# Supplementary material
Source: Springer Nature journal article supplement (http://www.springermedizin.de/resource/supplementary/12891_2012_1617_MOESM2_ESM.pdf/9508986)

■ Male ■ Female

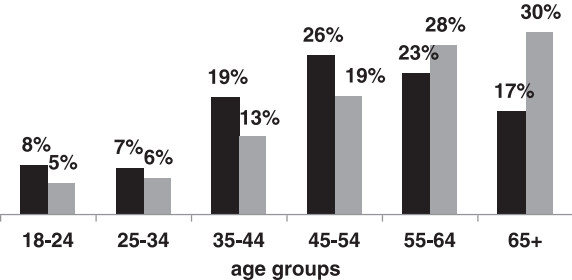

Supplement: MOESM2 [file 9508986]
